# Supplementary material
Source: ML conference proceedings conference paper supplement (https://openreview.net/forum?id=h5OBgS-iP_D)

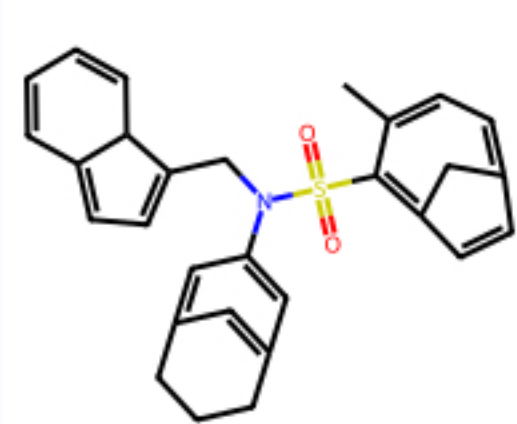

0.03648

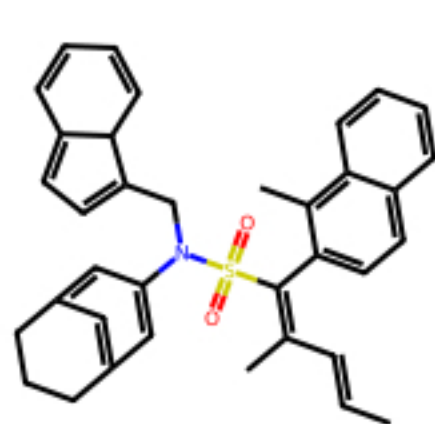

0.03352

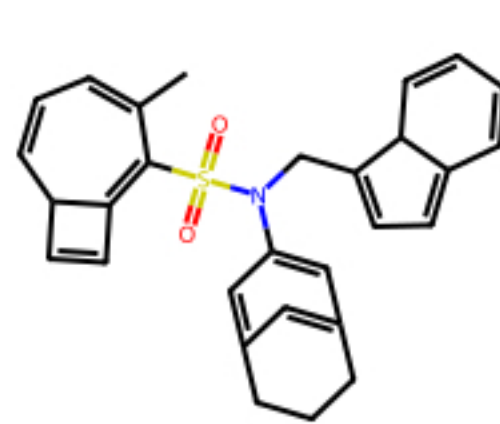

0.04105

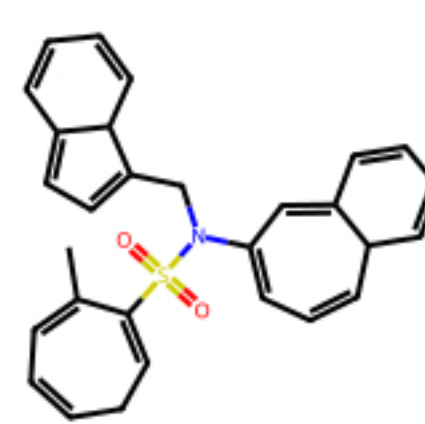

0.06155

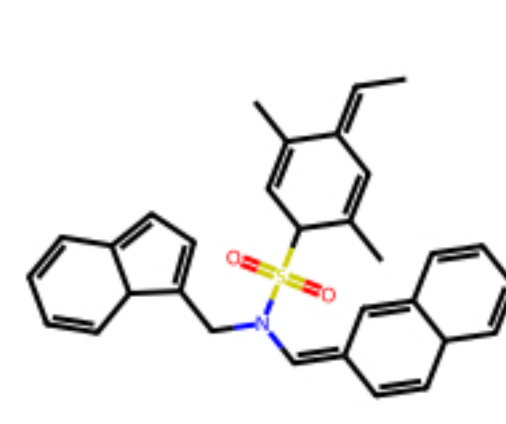

0.06260

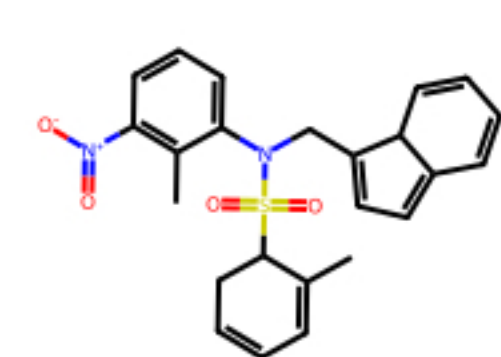

0.09075

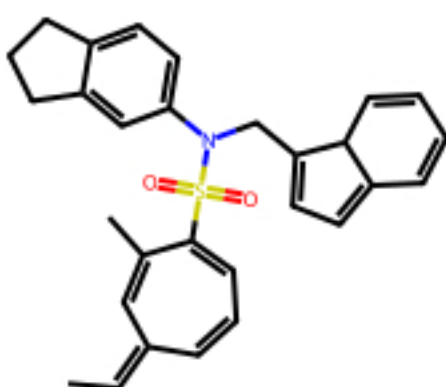

0.09708

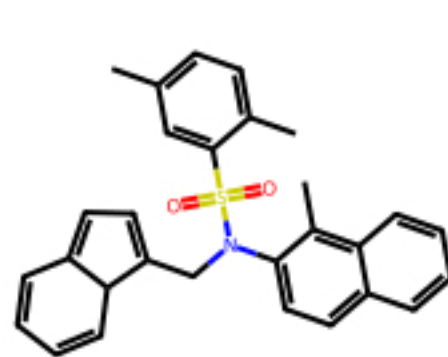

0.13155

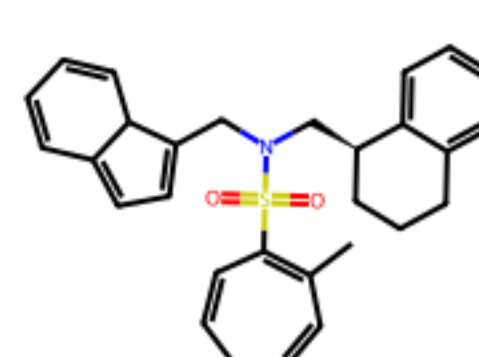

0.13607

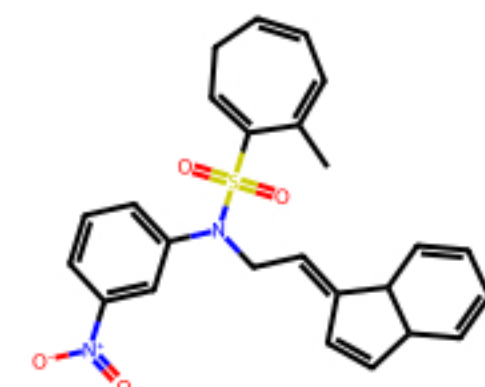

0.14805

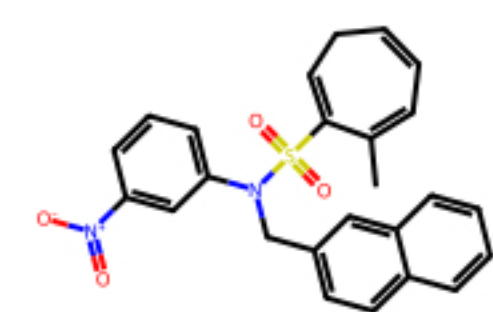

0.18751

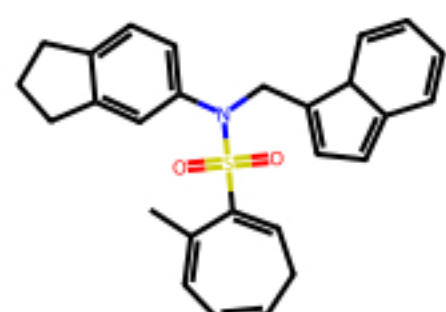

0.20061

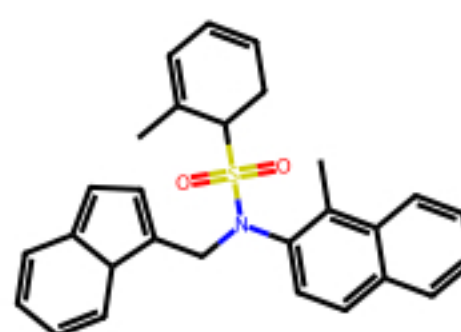

0.22198

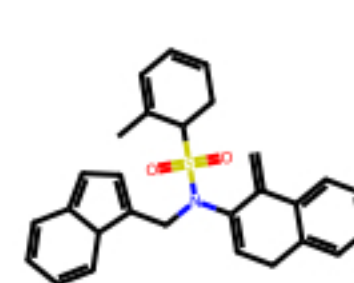

0.22961

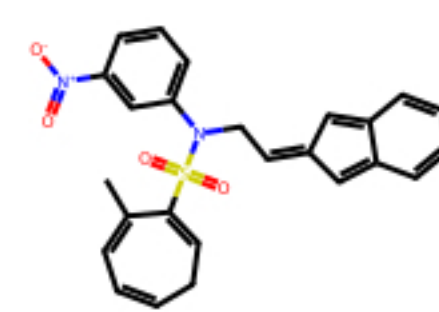

0.24153

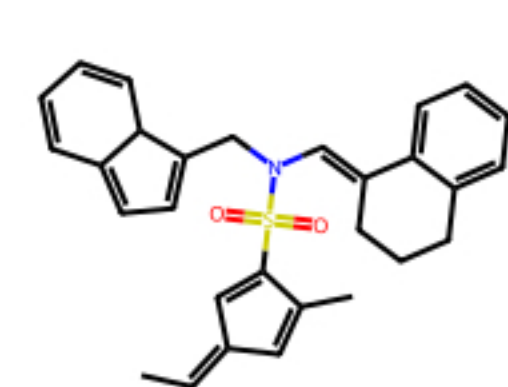

0.26727

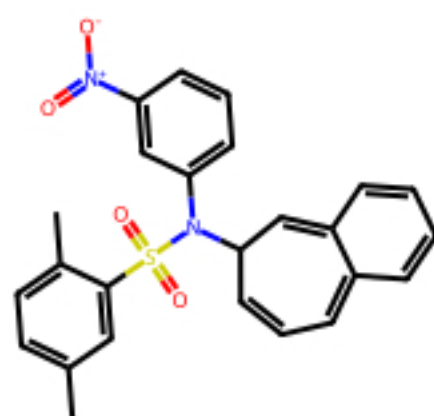

0.27182

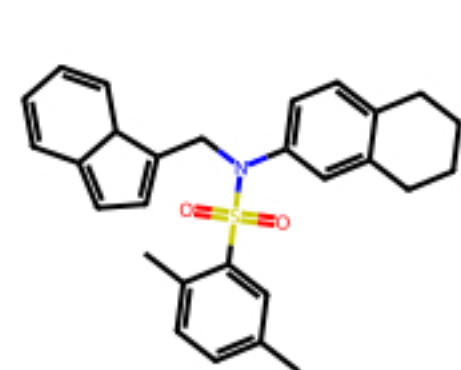

0.27645

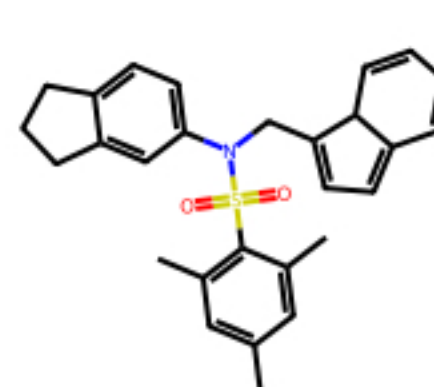

0.31641

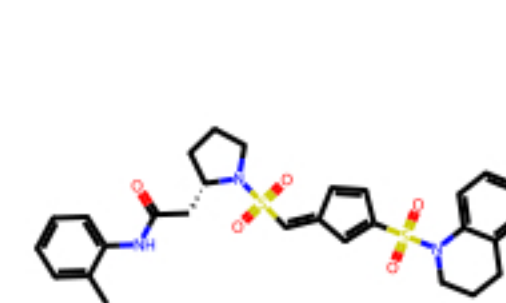

0.35013

Supplement: supplementary_material [file attachment]

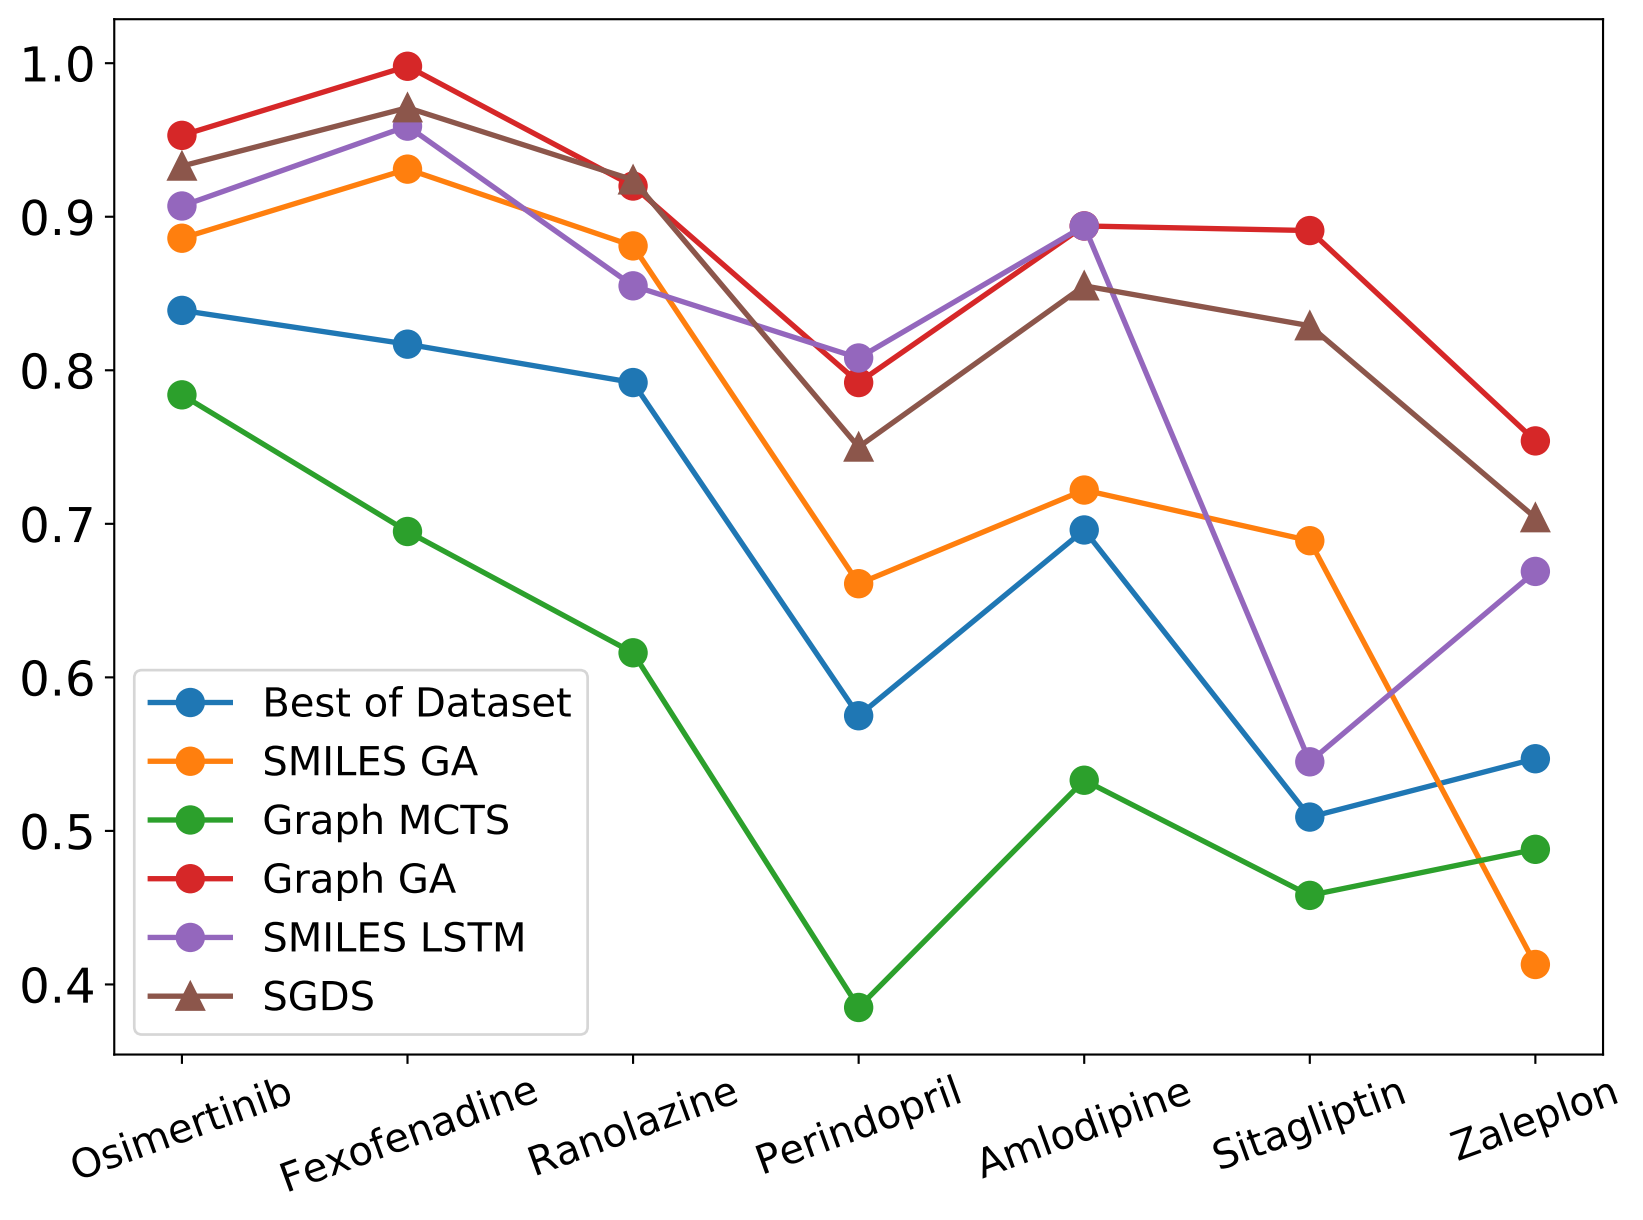

Supplement: supplementary_material [file attachment]

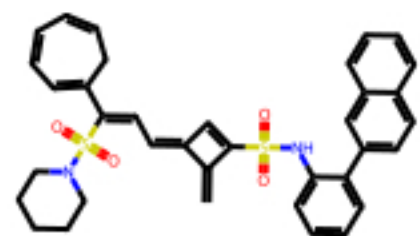

0.10563

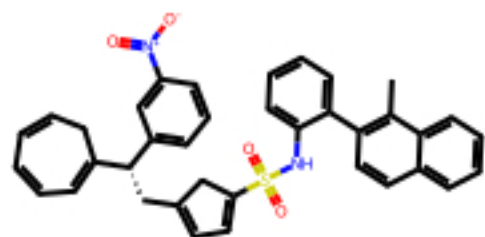

0.11493

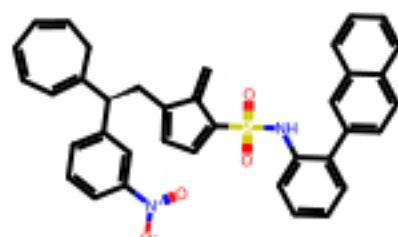

0.11888

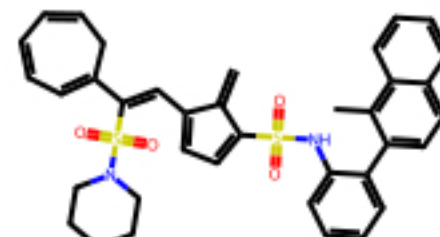

0.13379

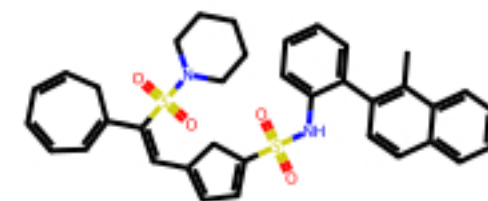

0.14557

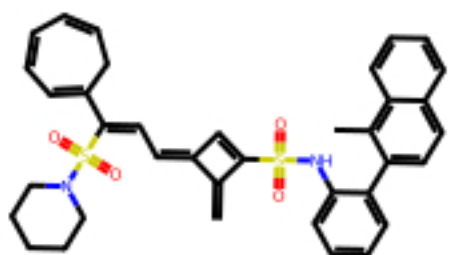

0.15839

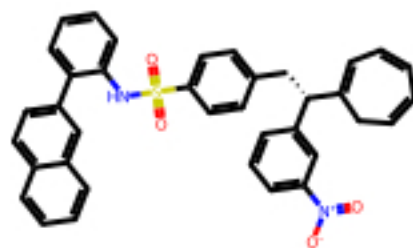

0.17825

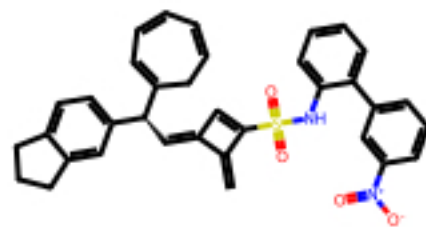

0.27645

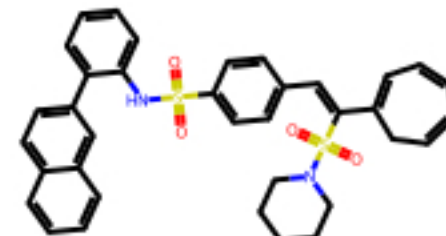

0.28115

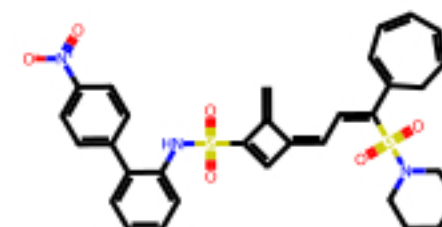

0.28115

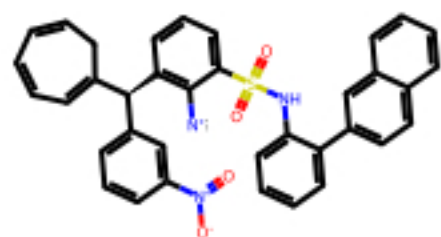

0.28594

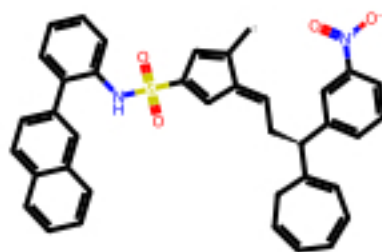

0.31112

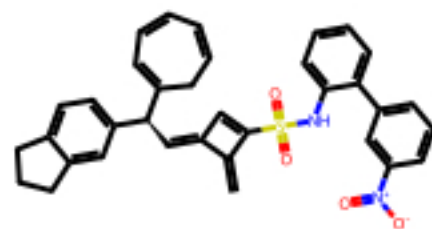

0.32728

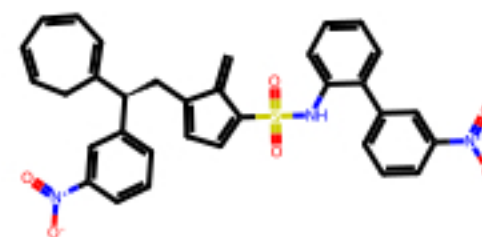

0.40075

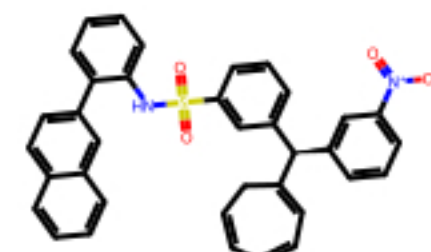

0.42874

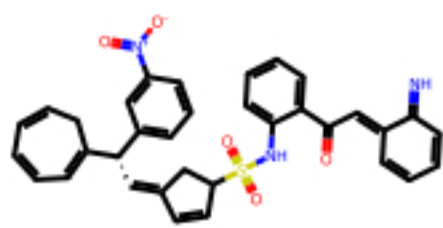

0.42874

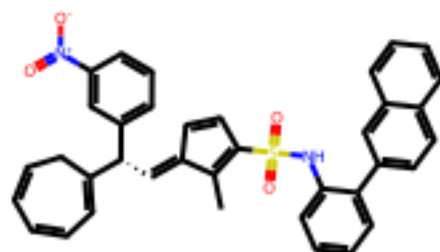

0.48251

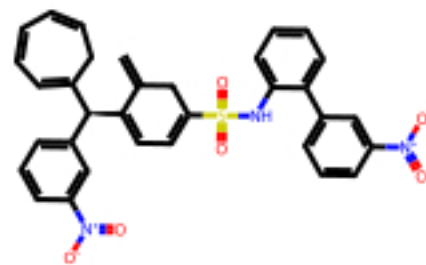

0.53393

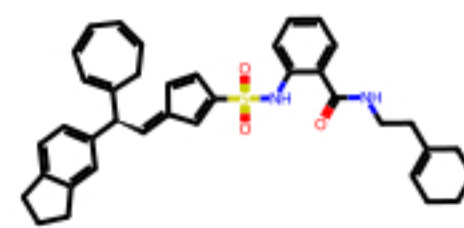

0.60089

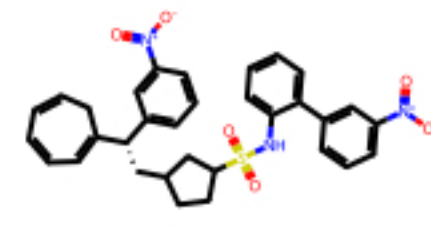

0.66493

Supplement: supplementary_material [file attachment]

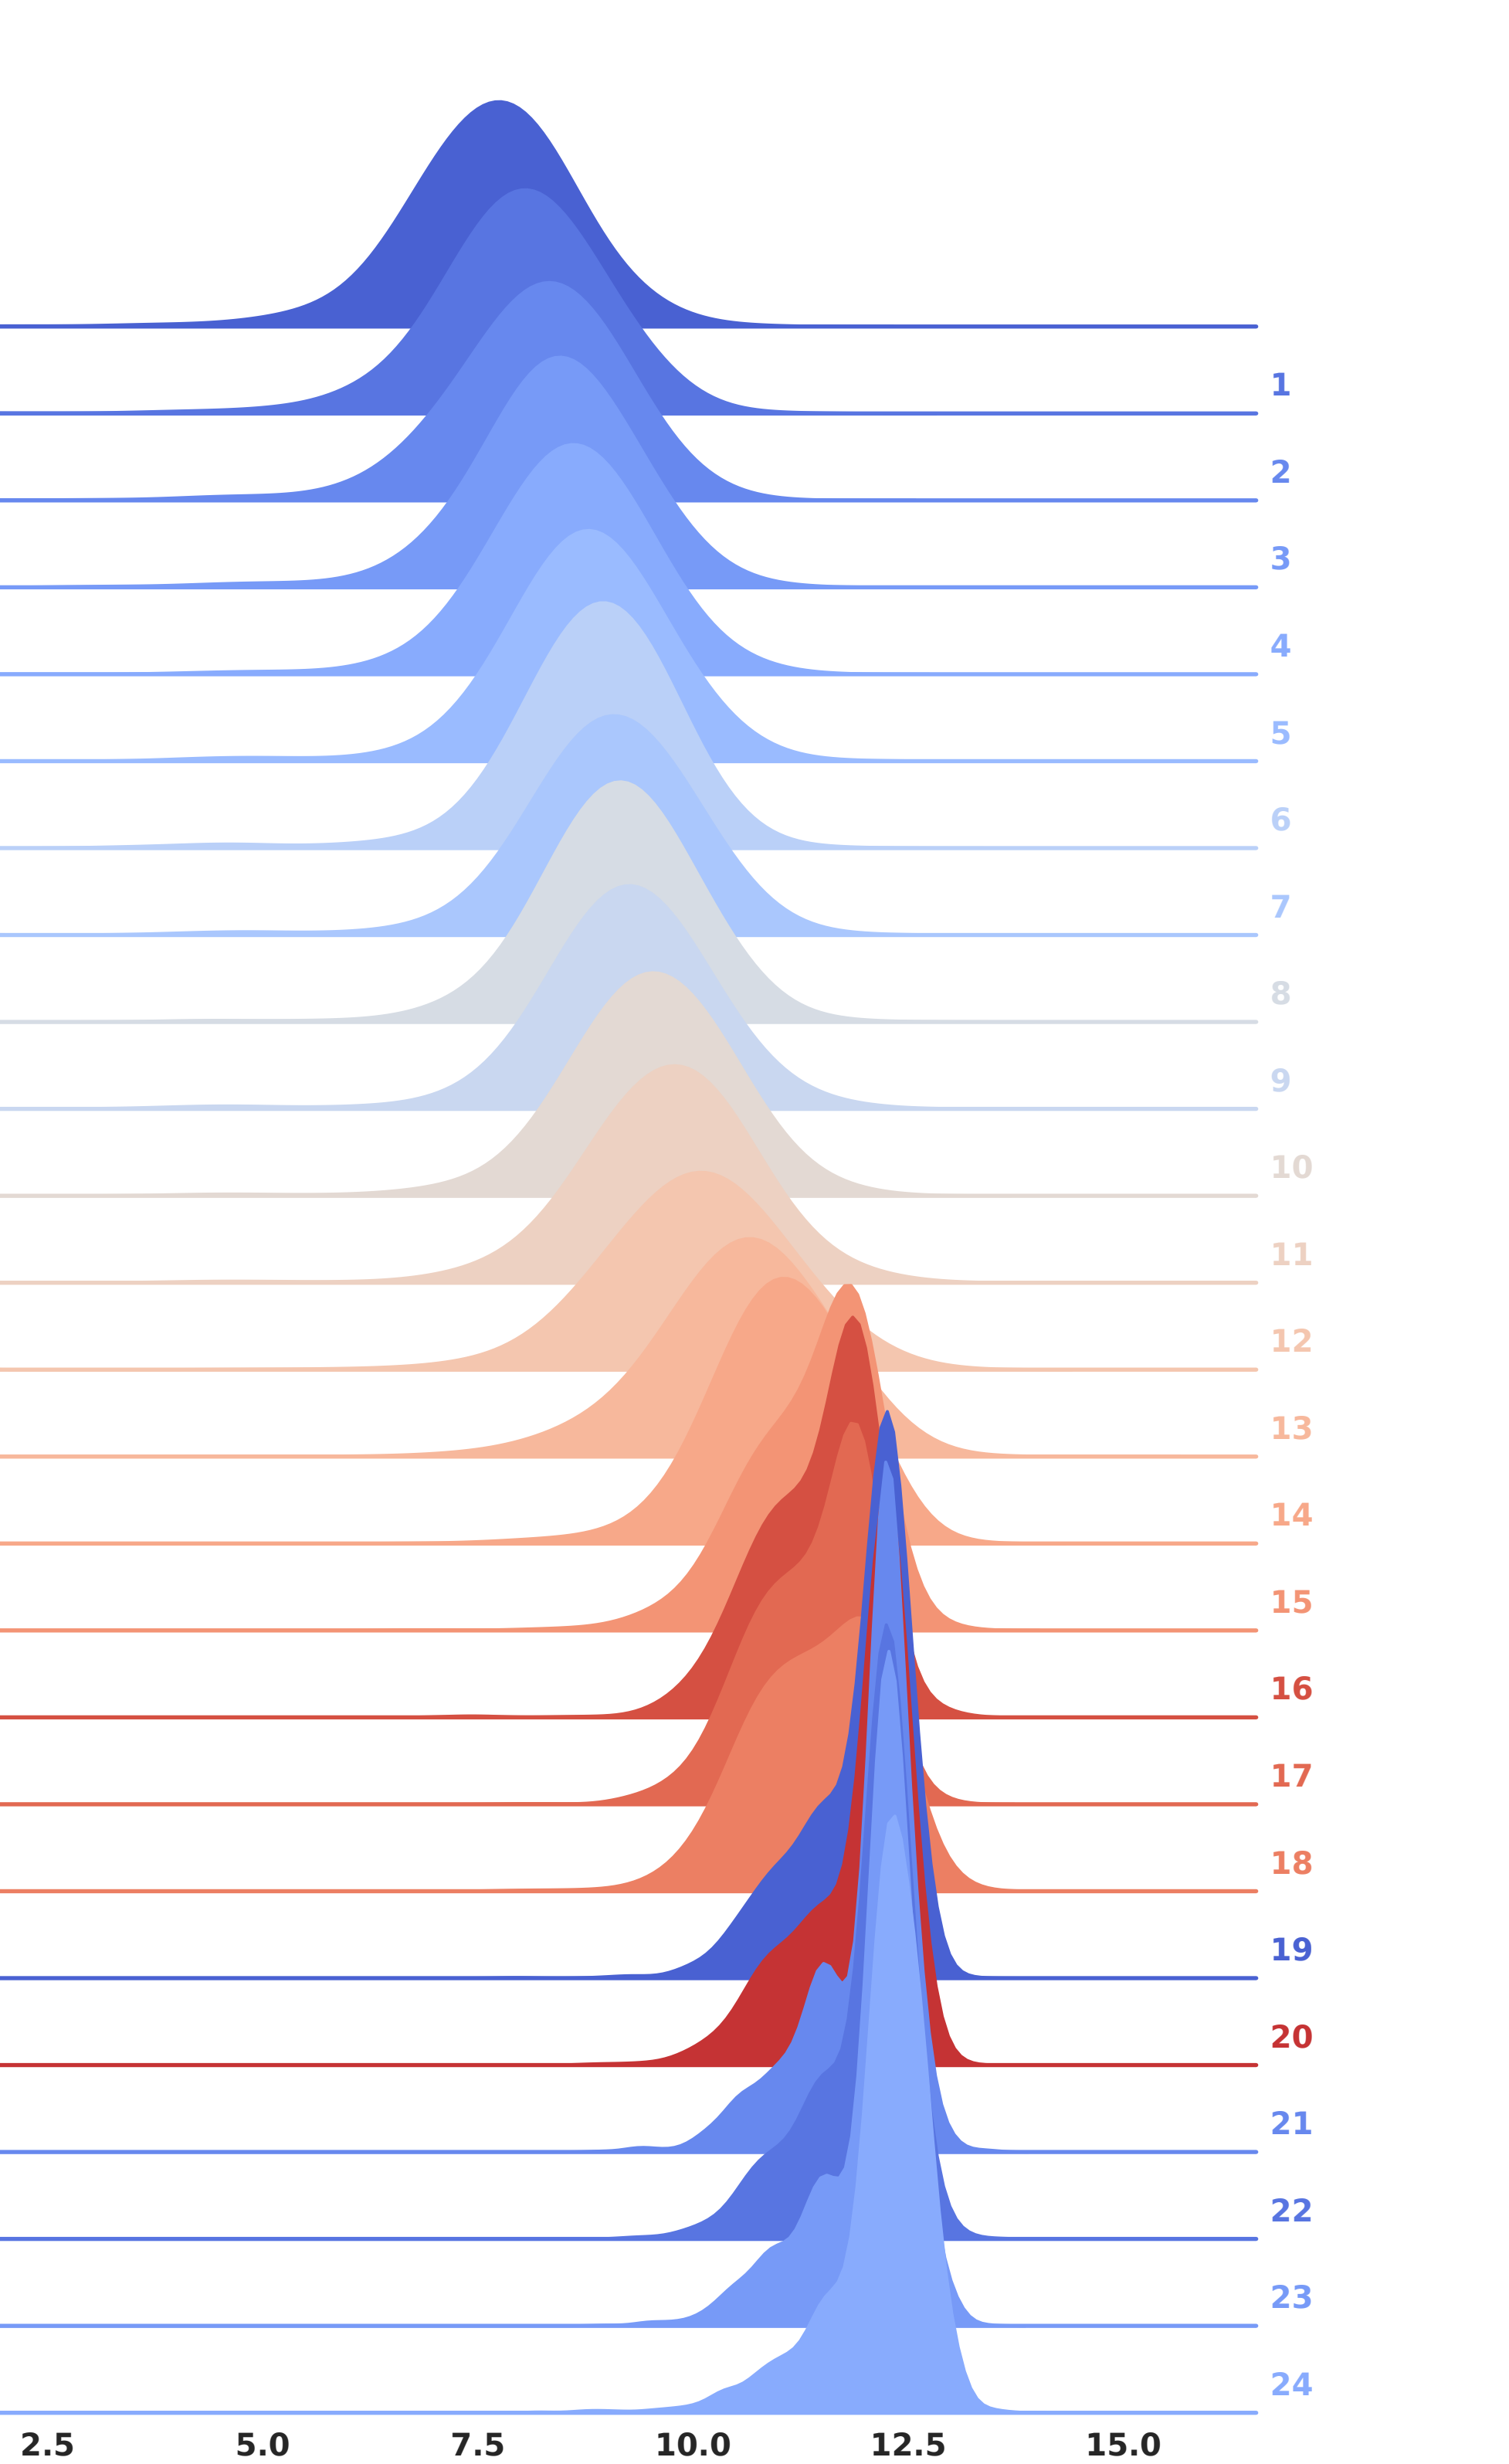

Supplement: supplementary_material [file attachment]

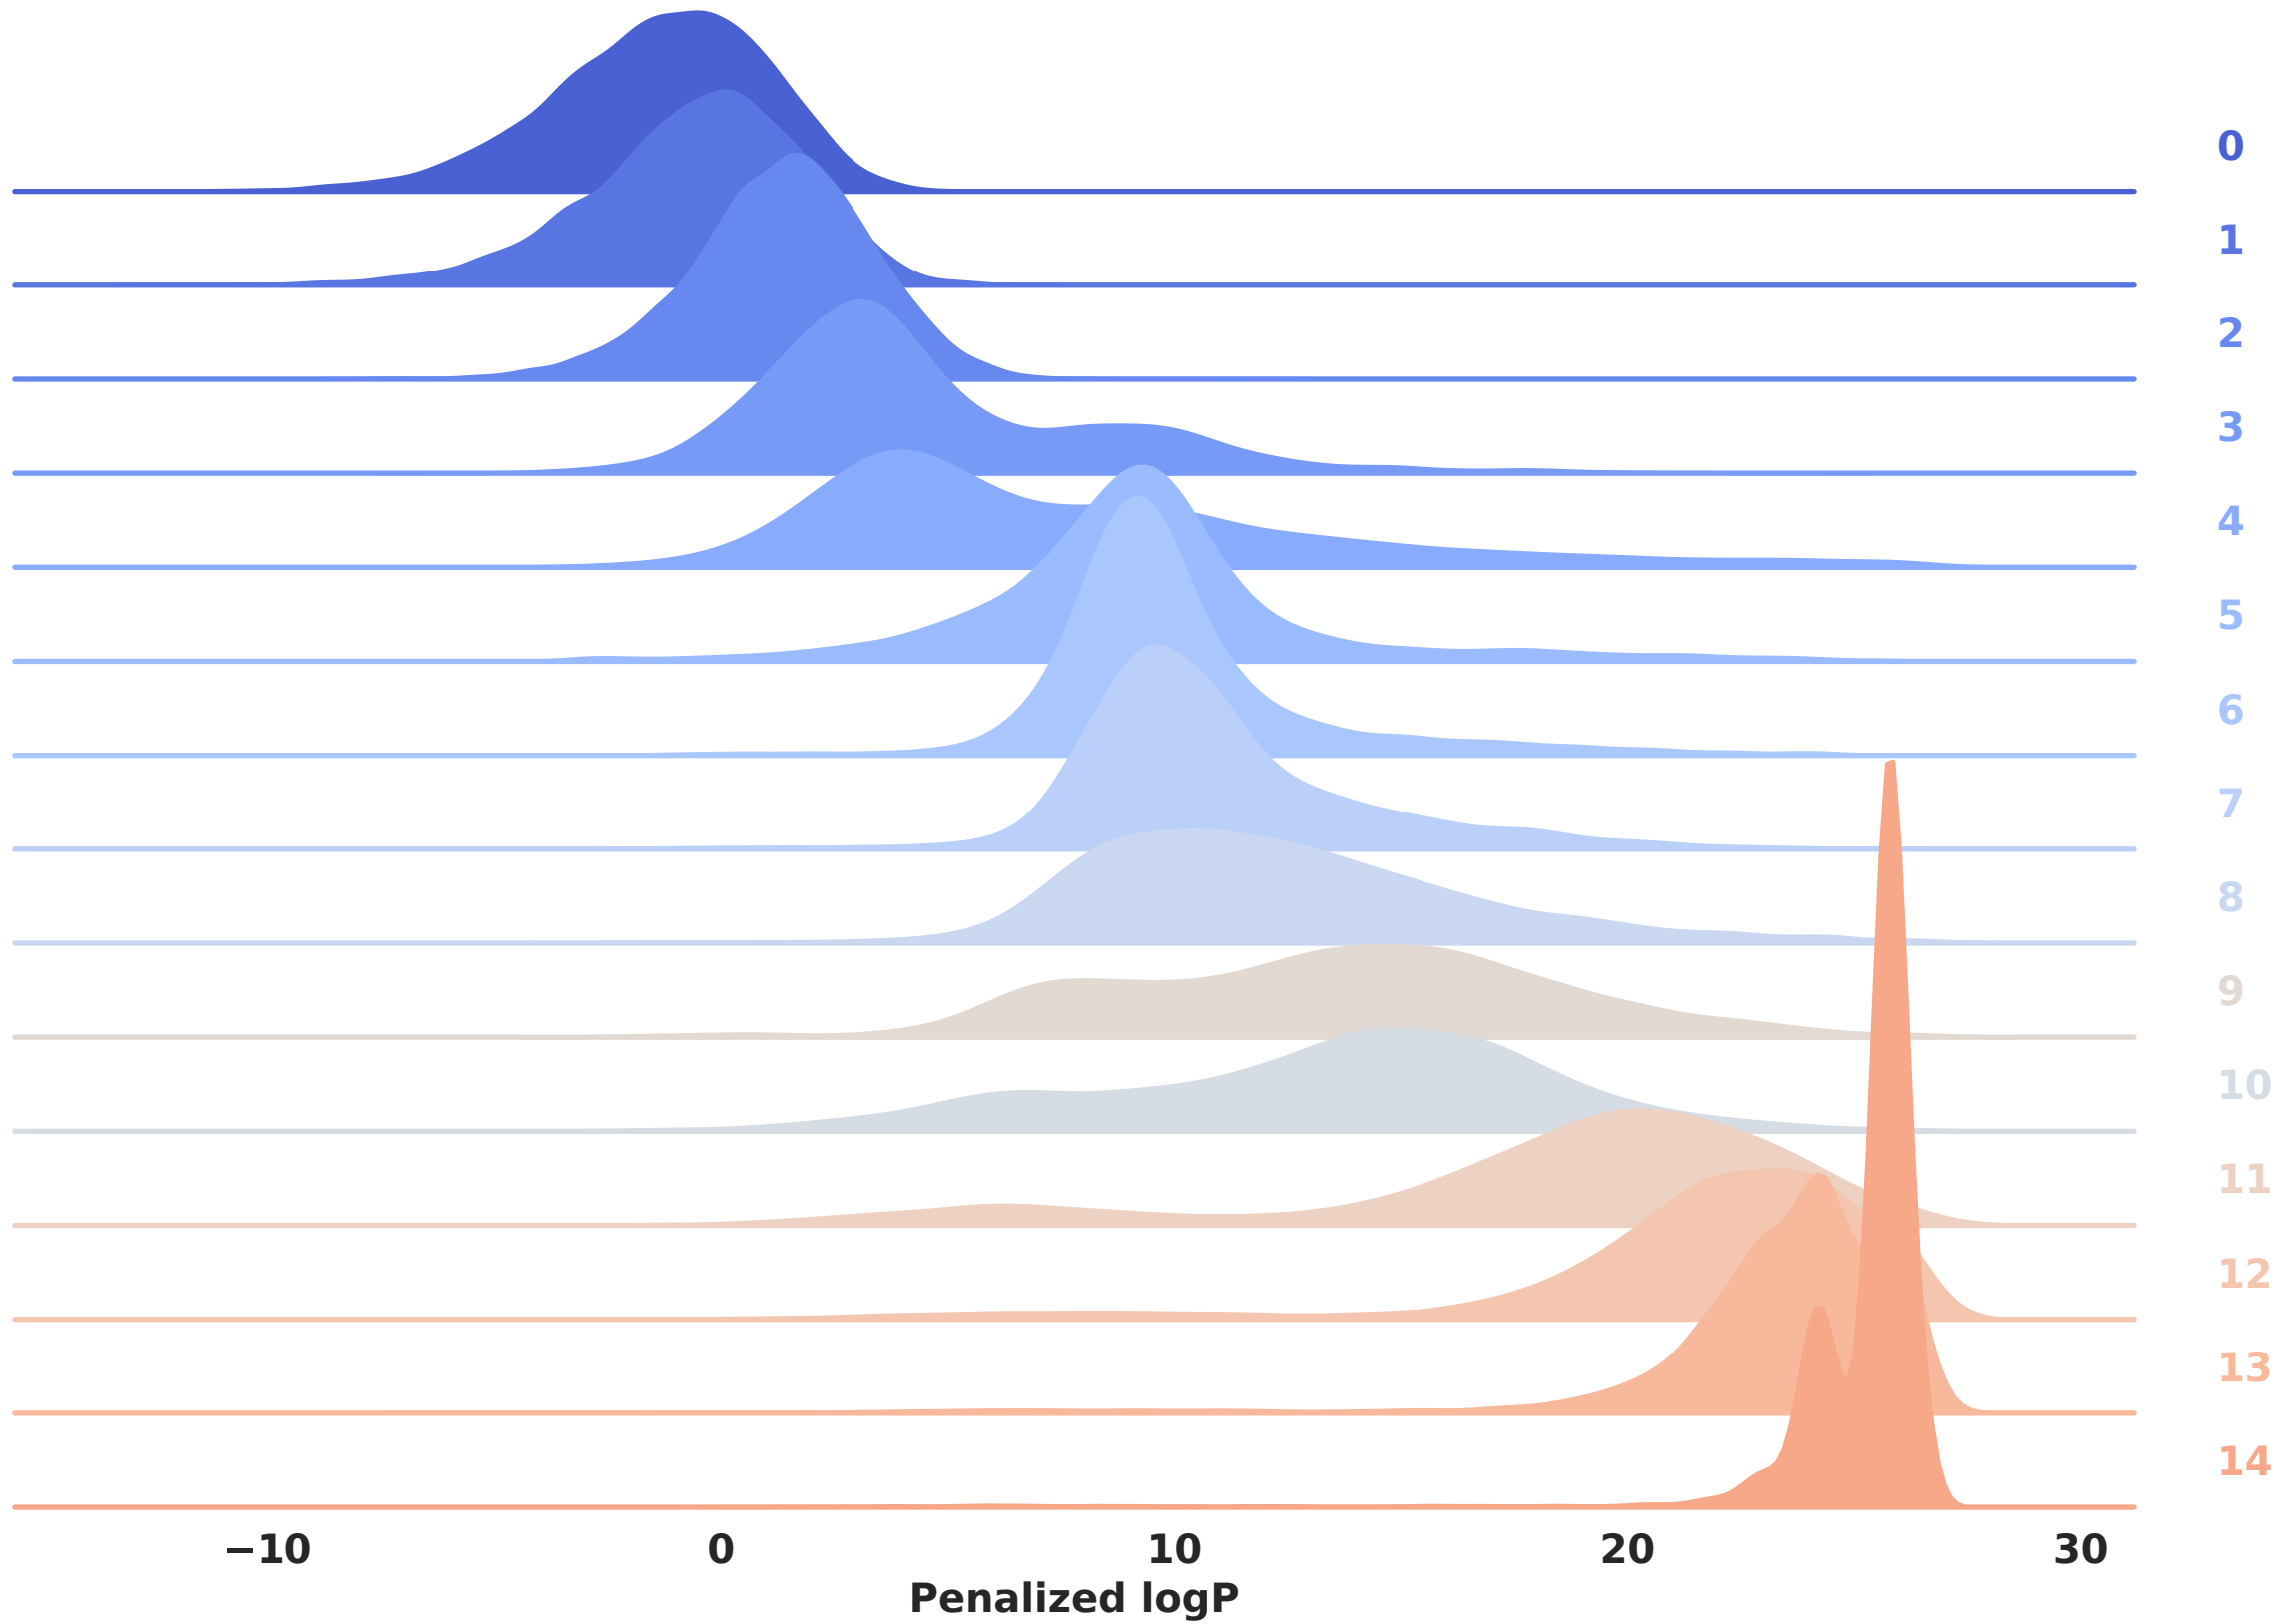

Supplement: supplementary_material [file attachment]

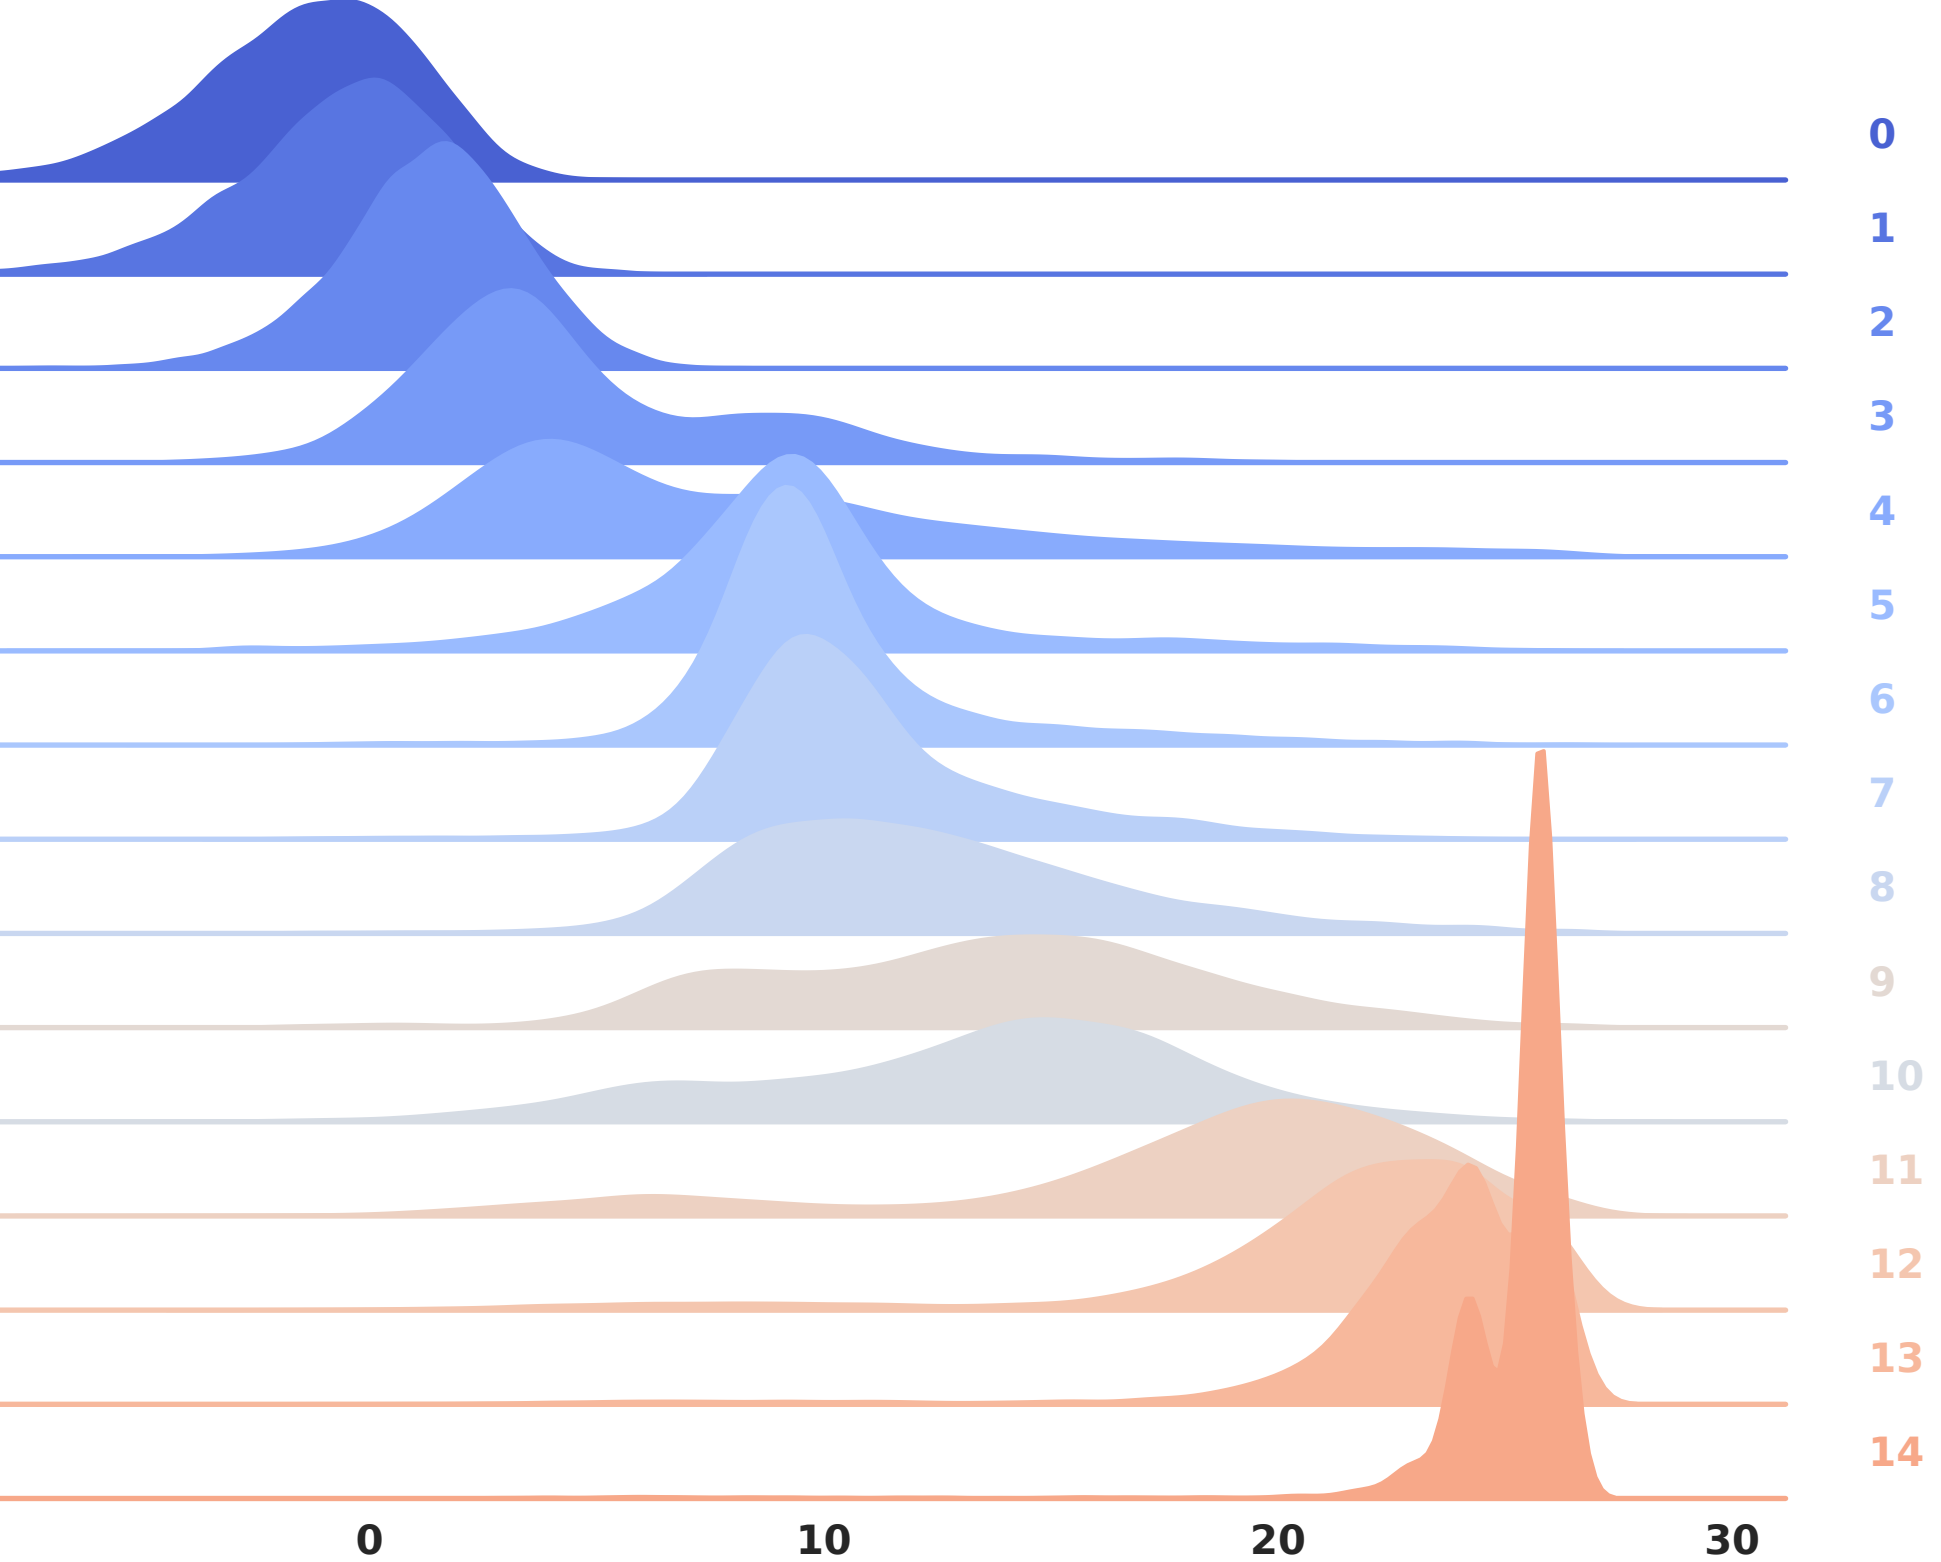

Supplement: supplementary_material [file attachment]

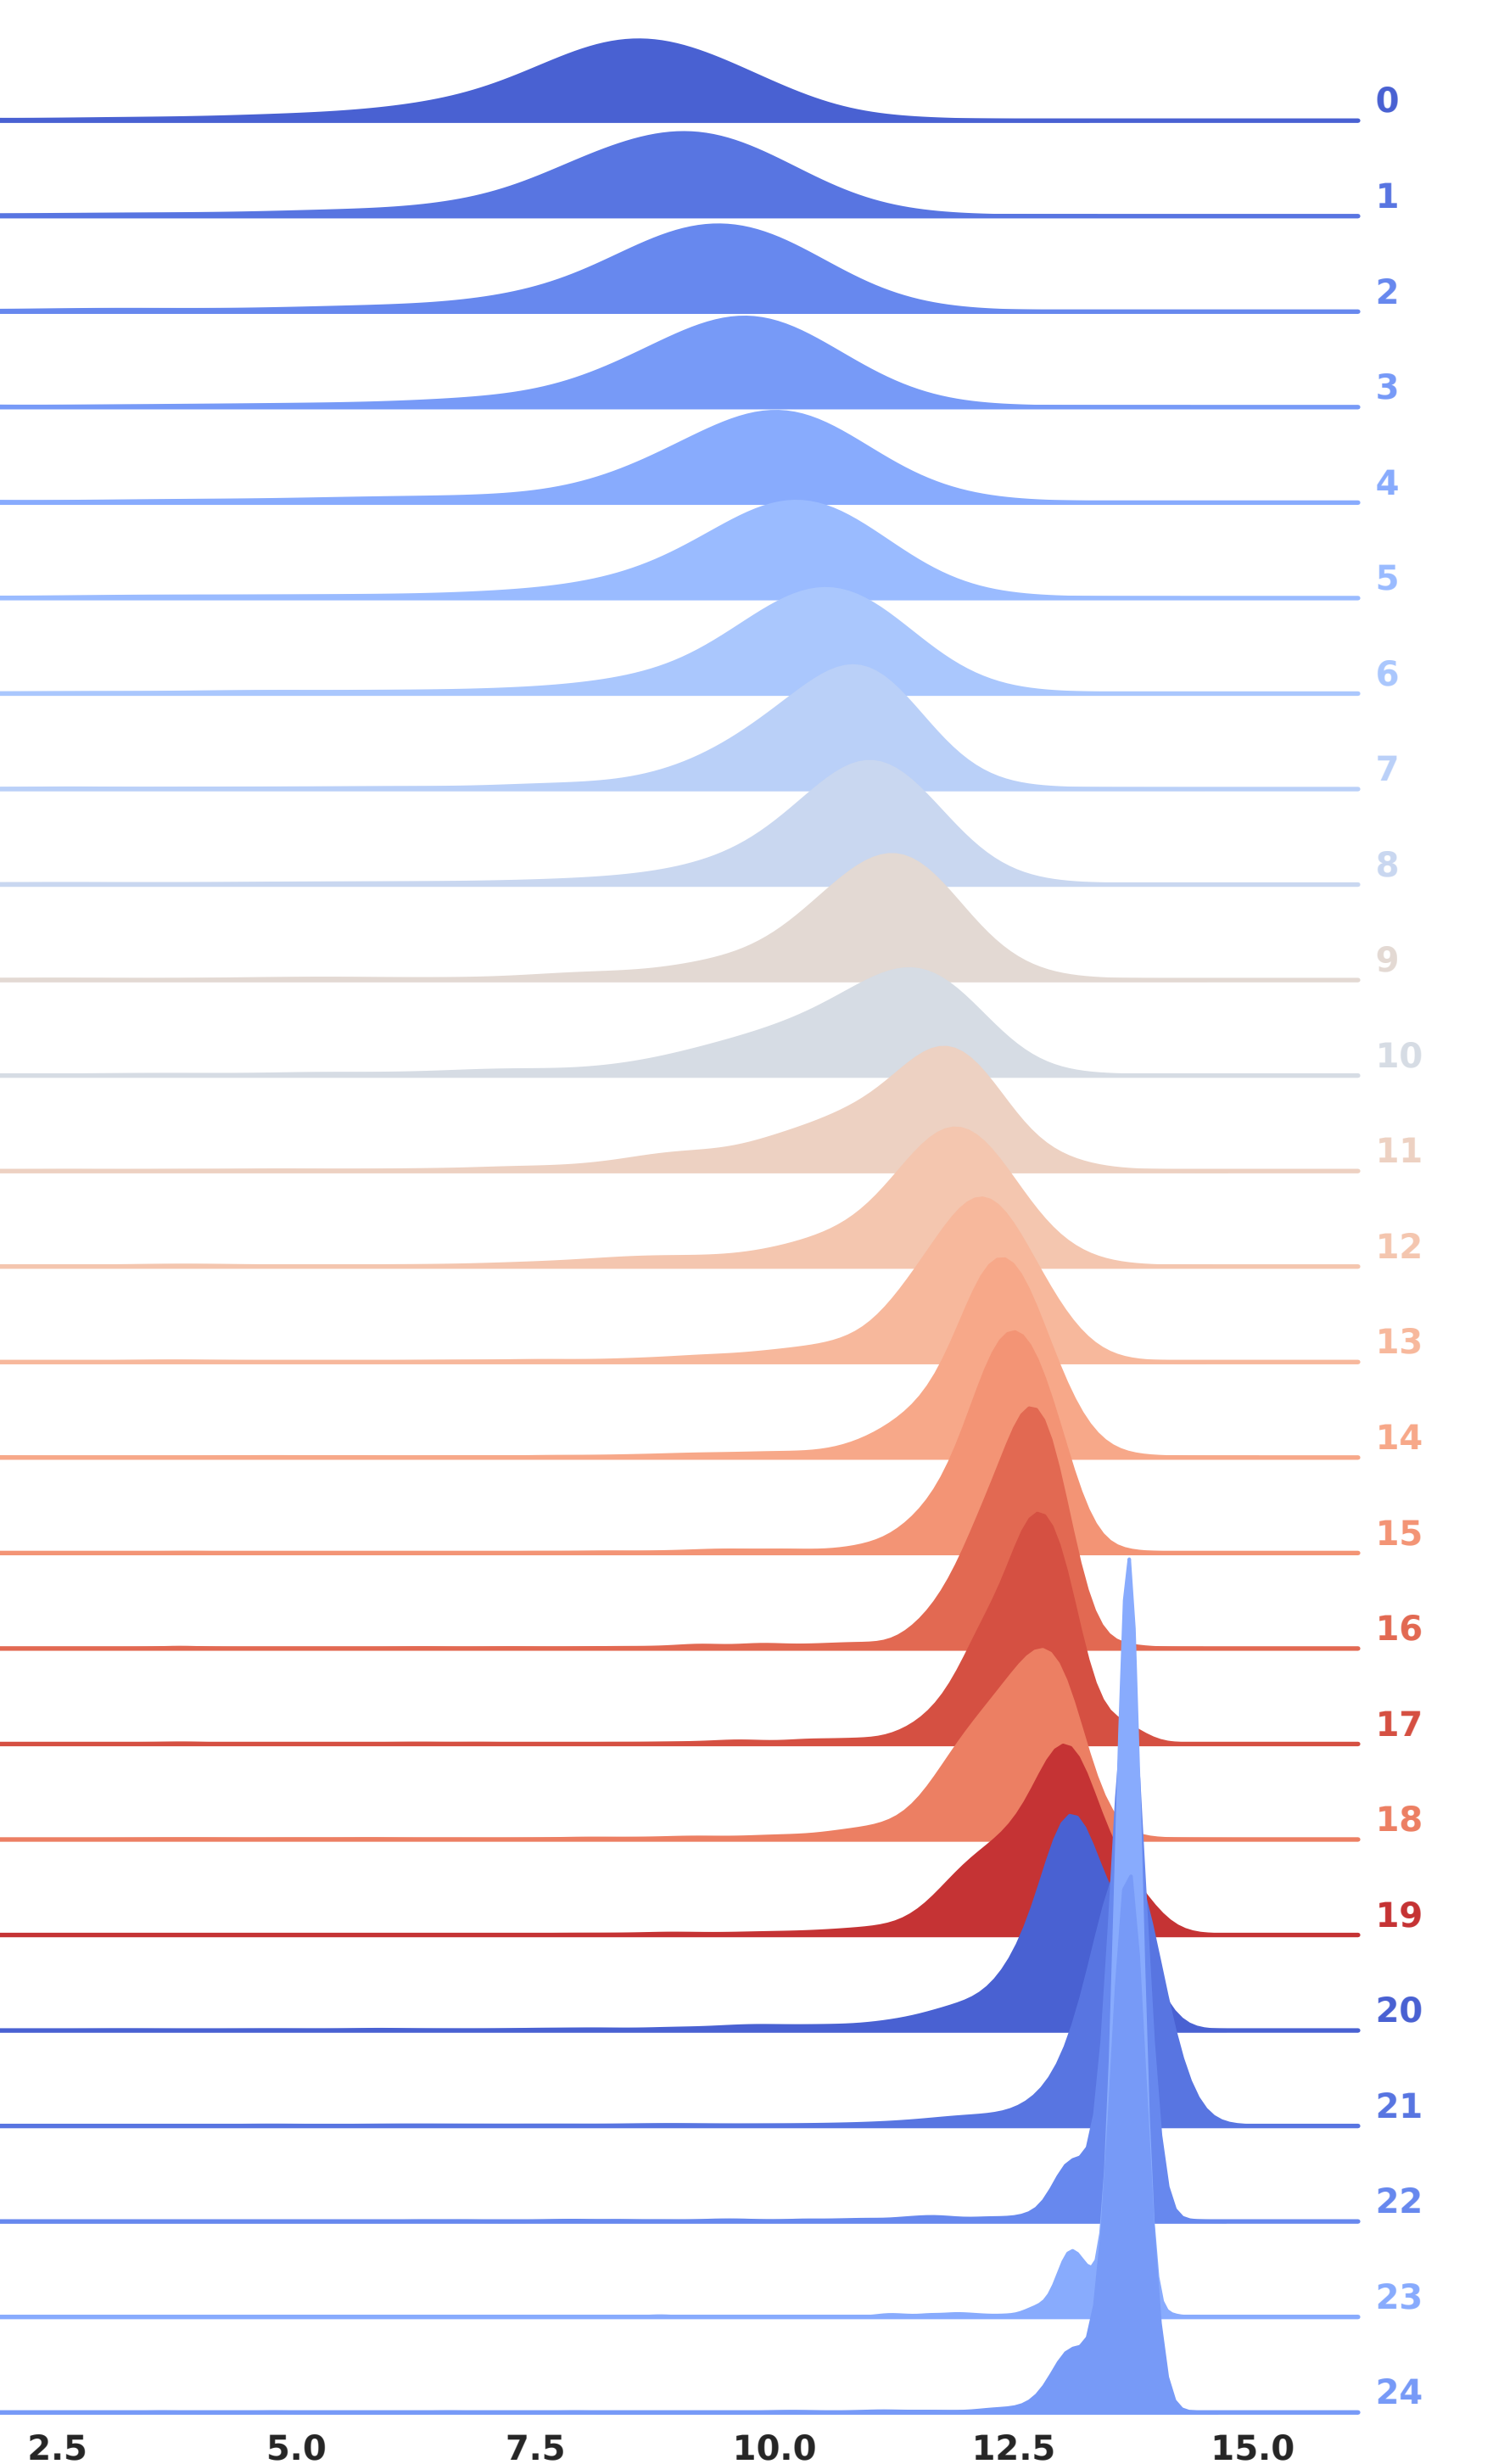

Supplement: supplementary_material [file attachment]

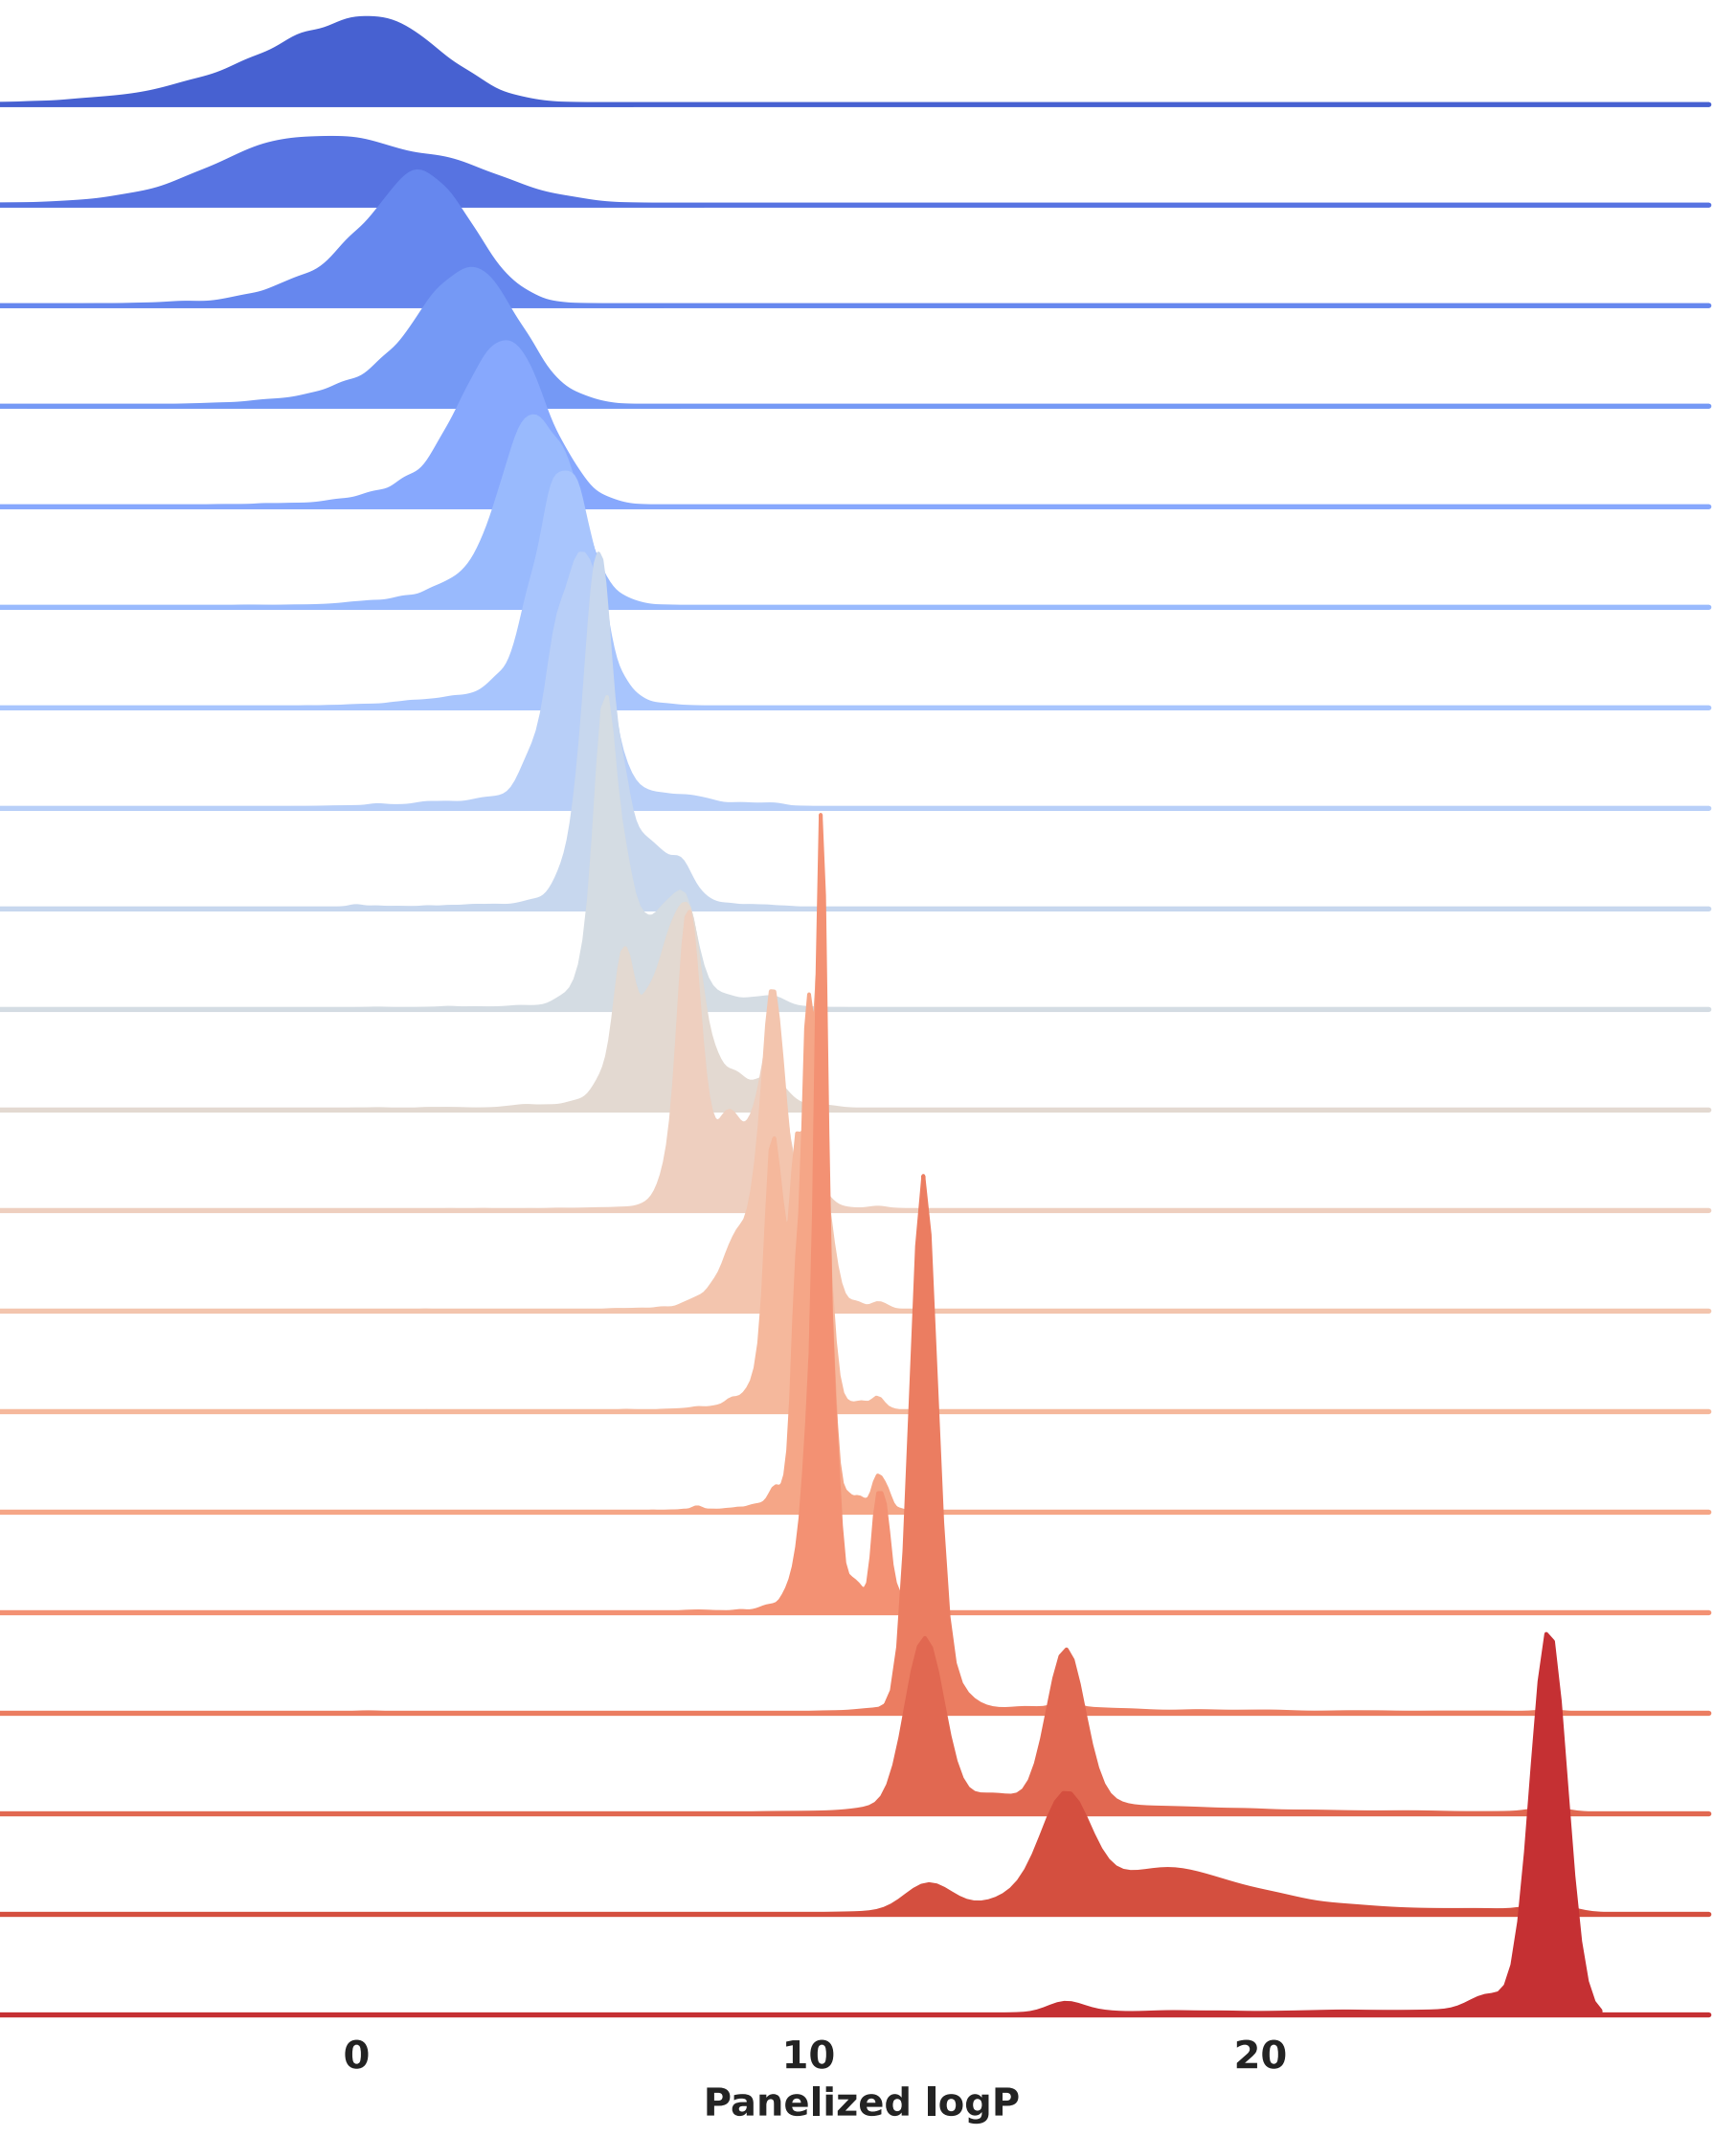

Supplement: supplementary_material [file attachment]

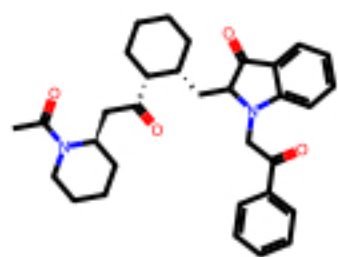

0.356 3.99 0.435

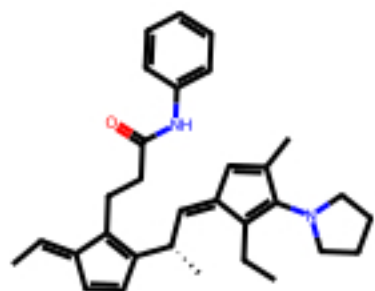

1.284 3.86 0.441

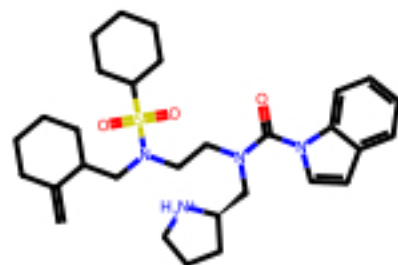

1.470 4.51 0.515

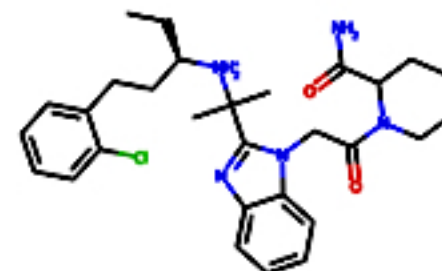

1.711 3.85 0.42

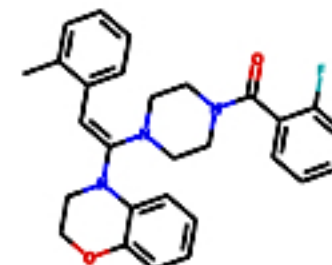

2.280 2.57 0.56

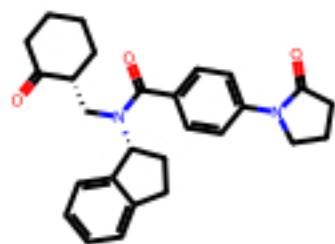

2.280 3.28 0.691

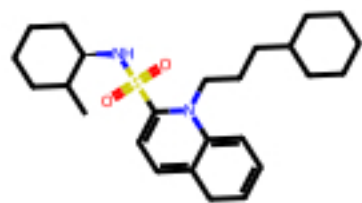

2.280 3.95 0.557

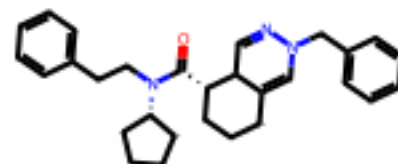

2.358 4.46 0.577

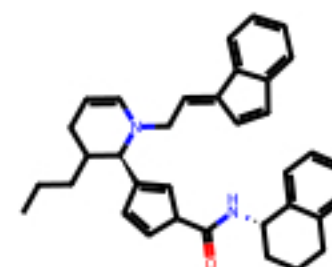

2.398 4.63 0.428

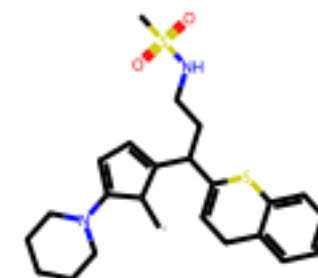

2.439 4.30 0.680

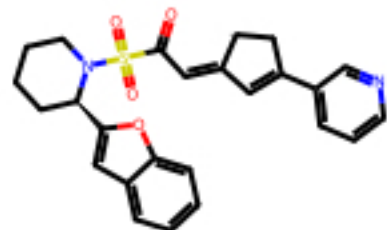

2.699 3.86 0.535

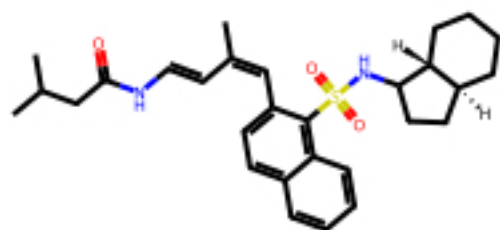

2.699 4.02 0.431

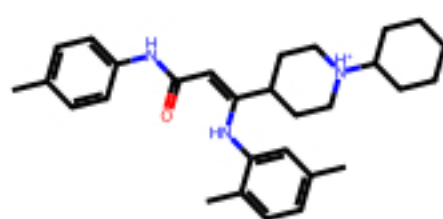

2.745 3.45 0.536

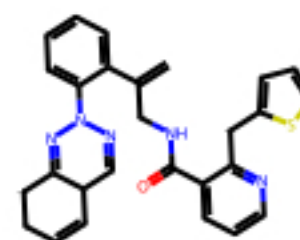

2.745 4.42 0.492

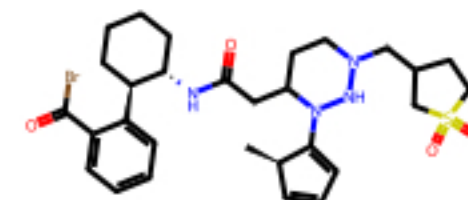

2.986 5.37 0.425

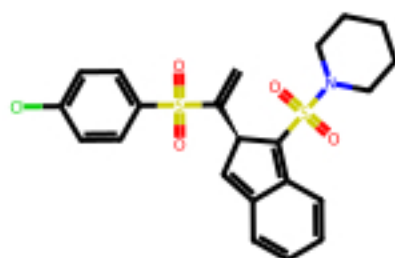

3.249 3.47 0.683

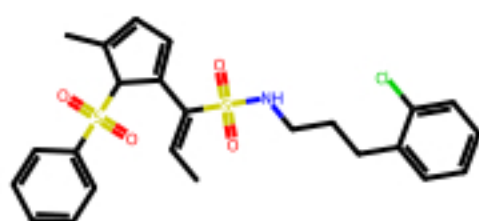

3.305 3.56 0.510

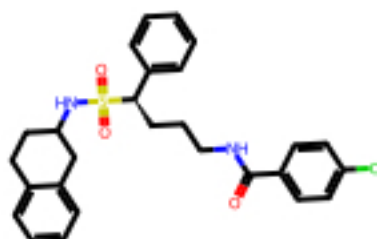

3.476 3.13 0.406

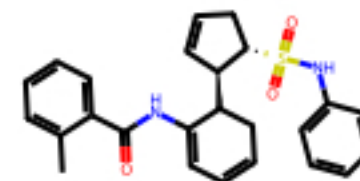

3.847 3.82 0.654

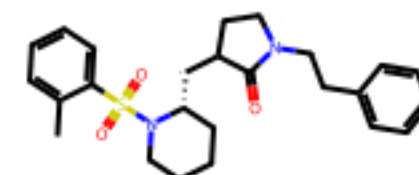

3.979 3.44 0.659

Supplement: supplementary_material [file attachment]

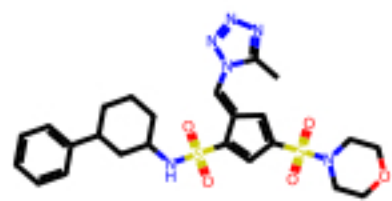

4.554 4.07 0.556

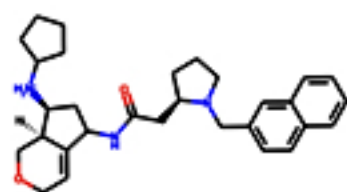

5.671 4.58 0.60

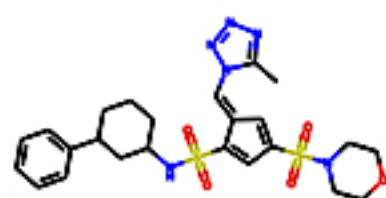

6.602 4.07 0.56

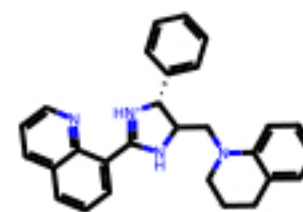

8.084 4.16 0.535

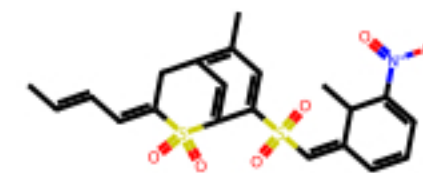

8.222 5.42 0.512

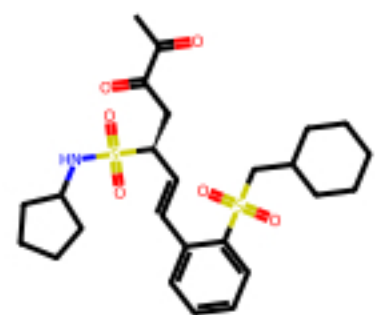

8.649 3.56 0.454

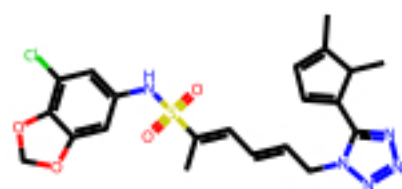

9.899 4.21 0.604

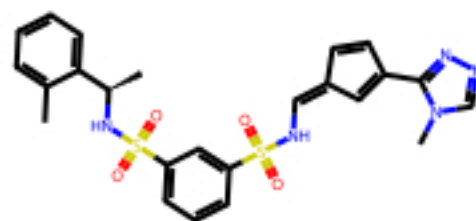

10.067 3.52 0.479

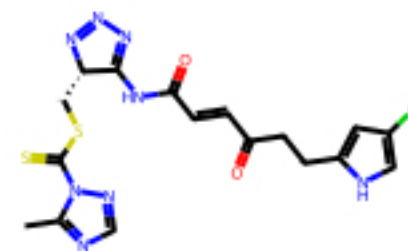

10.770 5.03 0.480

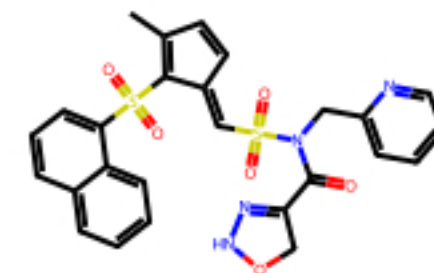

11.918 3.74 0.474

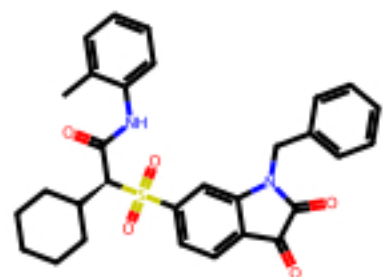

12.121 3.05 0.429

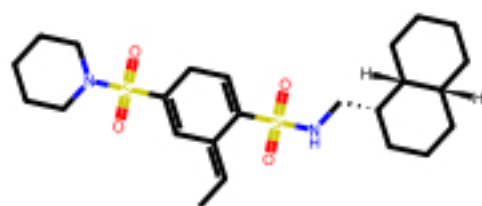

12.328 4.22 0.606

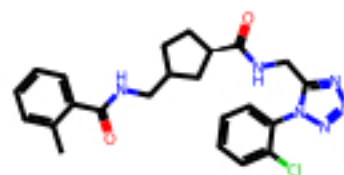

13.188 3.07 0.573

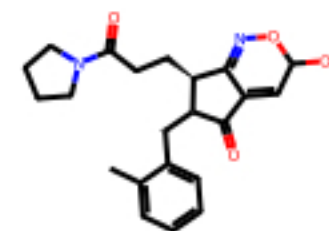

14.110 4.29 0.849

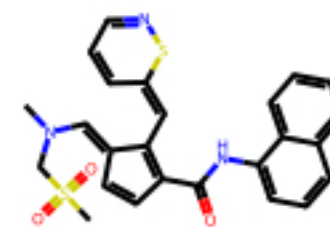

15.095 3.80 0.614

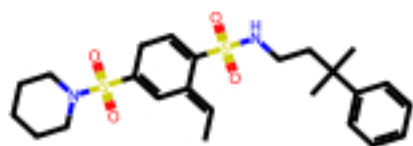

15.613 3.18 0.607

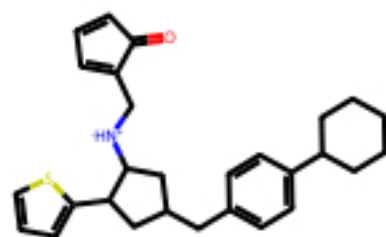

15.879 4.25 0.633

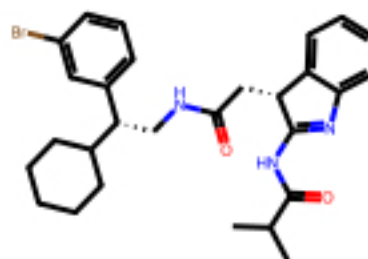

16.149 3.61 0.452

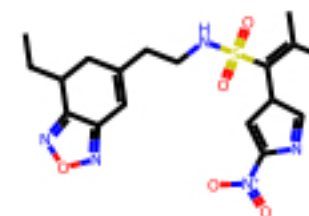

16.424 5.12 0.502

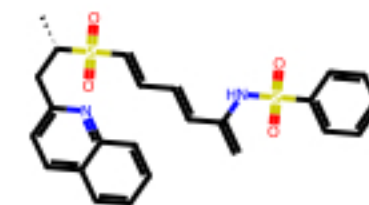

18.799 3.51 0.477

Supplement: supplementary_material [file attachment]
